# Supplementary material
Source: PubMed Central journal article supplement (PMC4285363)

## Supporting Information

**Fig. S1.** Alignment of known chemoreceptors of *S. enterica* with McpB and McpC. Identified ligand-binding residues are highlighted within ovals, whereas shared homologous regions with distinct functions are color-coded, their approximate boundaries indicated with jagged edges. Not shown are Aer and Tip, which do not have a substantial periplasmic domain. The cytoplasmic receptor McpA is also not shown.

**Fig. S2.** Description of the FRET system and typical responses to cystine and cysteine. (A) Schematic representation of the FRET system used in this study (see text for details). (B) and (C) From top to bottom: changes in the yellow (Y) fluorescence channel, cyan (C) fluorescence channel, Y/C ratio and Y/C ratio corrected for baseline drift: (B) at 0 s 200  $\mu$ M cystine is added, removed after 500 s; (C) at 0 s 200  $\mu$ M cysteine is added, removed after 400s. (B) and (C) serve as an illustration of attractant and repellent responses of wild-type *S. enterica* (TSS500).  $\Delta FRET$  in Figs. 3, 4, and 5 is plotted after baseline correction and expressed in arbitrary units of  $\Delta Y/C$ .

**Fig. S3.** Comparison of differences in the FRET responses to  $\alpha$ -methyl-aspartate (MeAsp) (A) and serine (B) in the presence and absence of the native (and hence unlabeled) *cheY* and *cheZ* genes. FRET responses of LT2  $\Delta(\textit{cheY cheZ})$  (TSS500, referred to as LT2 YZ-), LT2 (referred to as LT2 YZ+) and 14028 strain to 100  $\mu$ M MeAsp and 100  $\mu$ M serine are shown. The LT2 YZ- strain shows a greater amplitude of the response to both chemoeffectors than the other two strains. Other descriptions as in Fig. 3.

**Fig. S4.** Short-time chemical-in-plug assay. In this assay, wild-type *S. enterica* (14028) were suspended uniformly at a high cell density in a soft-agar plate. Hard-agar plugs containing the test chemical were inserted in the agar, and the response monitored within 30 min at room temperature. See Experimental Procedures for more details. (A) control with no chemical added, (B) 1 mM leucine, (C) 0.3 mM cystine. Only low concentrations of cystine could be used in this assay (100-300  $\mu$ M) because achieving higher concentrations requires dissolution in HCl, which by itself gives a repellent response in this short-time assay.

**Fig. S5.** Chemical-in-plug assays. The experimental set up was as described in Fig. 6B. At 10 mM, cystine stays soluble only in an acidic solution (0.37% HCl), so HCl controls were also included. Bacteria were inoculated away from the plug, and their migration was observed after 20 h at 37°C. BC only\* (JW20).

Fig. S1

|      |                                                                                                        |     |                                                                |
|------|--------------------------------------------------------------------------------------------------------|-----|----------------------------------------------------------------|
| MCPB | -----MRLQNFTIRMVMLTILG-LFCLLWSGVGLYSVHALSEVSEGNIDRHLVRQMTVLSQGNQYFRFVTRLSRAMD-----VKIG                 | 78  |                                                                |
| MCPB | -----MFLHNKIRSKLFMAFG-LFIVLVMVSSALSFLSLDRANTGMQNIITNDYPTTVKANLLIDNFNDFIIAQQLMLLD-----EEG               | 78  |                                                                |
| TRG  | MGNTFSMQASHKLGFLHHIRLVPLFSSILGGILLFALSAGLAGYFLIQADRDQRDVTDEIQVRMG-LSNSANHLRTARINMIHAGA-----ASRIAEMD    | 94  |                                                                |
| TSR  | -----MLKRIKIVTSLLLVLA-LFGLLQLTSGGLFFNSLKNKDNFTVLTQIRQQQSALNATWVELLQTRNTLNRAQIRWMMDQSNIGSGA             | 85  |                                                                |
| TAR  | -----MFNRIRVVTMLMMVLG-VFALLQLVSGGLFSSIQHNQQGFVISNELRQQQSELTSTWDLMLQTRINLSRSAARMMDASNQQS-S              | 84  |                                                                |
| TCP  | -----MKNIKVITGVIAITLG-IFSAALLVTGILFYSAVSSDRLNFQNASALSQQQELGGSFQTLIETRVITNRVAFRMLKNQRDPASLD             | 84  |                                                                |
|      |                                                                                                        |     |                                                                |
| MCPB | GGTPDFAPARQSLENMRQKLEEMKALSPG-PMNPDISREVLSNWQALLEKGVVPQMQLAQQGSALTAWSEHASTVTPALSRAFASAEFSHEAGAMDNT     | 177 |                                                                |
| MCPB | RWSQSSQKELDEISQRITALLDELSSNRH-DAASQKIITEIREARQQYLESRFRILQDIQSHNRQAATQEMMTRTVQVKVYKDKVQELIAVQDAQMHNA    | 177 |                                                                |
| TRG  | EMKANIAAAETRIKQSQDGFNAYMSRAVK-TPADDALDNELNARYTAYINGLQFMLKFAKNGMFEAIINHENEQAKQLDAAYNHVLLKAIELRTERARLL   | 193 |                                                                |
| TSR  | TVAEELMQGATNTLKLTEKNWEQYEALPRD-PRQSEAAFLIKRTYDIYHGALAEIQLLGGAGKINEFFDQP---TQSYQDAFEKQYMAVMQQNDRLYDIA   | 181 |                                                                |
| TAR  | AKTDLQNAKTTLAQAAAHYANFKNMTPL-PAMAEAS-ANVDEKYQRQAALAEIQLFDNGNMDA YFAQP---TQGMQNALGEALGNARVSENLYRQT      | 179 |                                                                |
| TCP  | AMNTLLTNAGASLNEAEKHFNNYVNSEAI-AGKDPALDAQEASFQKMYDVLQQSIIHYLKDNYAA YGNLD---AQKAQDDMEQVYDQWLSQNAQLIKLA   | 180 |                                                                |
|      |                                                                                                        |     |                                                                |
| MCPB | RVMVDGKTYTIRILLITAVILGIAILIFTDRYLVAAMVVKPLERIRQQFQRIAQGDLSQPIEALGRNCVGRVPLLRAMQDLSREAVSTIRAGSDNIWRGA   | 277 |                                                                |
| MCPB | GVQVEGDFKTNRTLLITLALISIAAGCVMGWYIVRSITRPLDEAVRFAEAIADGDLTRHITTDYKDETVGLLQALMAMKTRLLDIVQEVQNGSESIATAA   | 277 |                                                                |
| TRG  | SEQAYQRTRLGMMFMIGAFTLALVLTLMTFMVLRRTVIQPLQQSASRIERIAAGDLTMADEPTGRSEIGRLSHHLQQMHALQQTAVGAVRQGAEEIYRGT   | 293 |                                                                |
| TSR  | VEDNNSYNQAMWVLSVLIIVLVVIAVWFVGIKLSLIAIPMNRLESIRHIASGDLVKRIDVEGSNEMGQLAENLRHMQSELMRTVGDVNRGANAIYSGA     | 281 |                                                                |
| TAR  | FDQSAHDYRFAQWQLGVLAVLVVLILMVVWFGIRHALLNPLARVITHIREIASGDLTKTLTVSGRNEIGELAGTVEHMQRSLLIDTVTQVREGSDAIYSGT  | 279 |                                                                |
| TCP  | SDQNQSSFTQMQLGIILLIVLIVLAFIWLGLQRVLLRPLQRIMAHIQTIADGDLTHEIEAERSEMGLAAGLKTMQQSLIRTVAVRDNADSIYTGA        | 280 |                                                                |
|      |                                                                                                        |     |                                                                |
| MCPB | TEISTGNNDLSSRTEEQAAALETAAASMEQLTATVKMNAEHARQASQLADAASLTAGKGGELVSDVVTMNGISASSQQIAEITTVINSIAFQTNILALN    | 377 |                                                                |
| MCPB | AQIVAGNQDLAARTEEQASSVEETAASMEQITATVKNTADHTSEATKLSAGAASVVKNGEMMNQVTQKMRVINDTANRMSDINIIDSIAFQTNILALN     | 377 |                                                                |
| TRG  | SEITAGNTDLSSRTEEQAAALETAAASMEQLTATVKQADNADNAHASKLAEDASGKASRGGQMVSGVQTMGNISSKKISEITAVINSIAFQTNILALN     | 393 |                                                                |
| TSR  | SEIAMGNNDLSSRTEEQAAASLEETAASMEQLTATVKQNAENARQASHLALSASETAQKGGKVDNVVQTMRDIASSQKIADIISVIDGIAFQTNILALN    | 381 |                                                                |
| TAR  | SEIAAGNTDLSSRTEEQASALEETAASMEQLTATVKQADNARQASQLASASETARHGGKVVDDGVVNTMHEIADSSKKIADIISVIDGIAFQTNILALN    | 379 |                                                                |
| TCP  | GEISAGSSDLSSRTEEQASALEETAASMEQLTATVRQNTDNARQATGLAKTASETARKGGRVVDNVVSTMNDIAESSEKIVDITSVIDGIAFQTNILALN   | 380 |                                                                |
|      |                                                                                                        |     |                                                                |
| MCPB | AAVEAARAGEQGRGFVAVVAGEVRNLASRSAGAAKEIEALIGESVRRVAQGAQLVQETGATMDAILRGVTEVTTIMKQIASASEEQSKGISQVGVAITQMD  | 477 |                                                                |
| MCPB | AAVEAARAGEHGRGFVAVVAGEVRQLAQKSASSASEIRNLIEDSTSQTQEGMHLVEKASALINGMVDNVEEMDVLIREIGQASREQTDGISQINSIAIGLID | 477 |                                                                |
| TRG  | AAVEAARAGEQGRGFVAVVASEVRTLASRSAGAAKEIEGLIGASVSLIEQGSSEVIAAGSTMNEIVDAVKRVTDIMLDIAAASDEQSRGIVQVSQAISEMD  | 493 |                                                                |
| TSR  | AAVEAARAGEQGRGFVAVVAGEVRNLQRSAGAAREIKSLIEDSVSRVDVGSSTLVEASAGETMDEIVNAVTRVTDIMGEIASASDEQSRGIDQVGLAVAEMD | 481 |                                                                |
| TAR  | AAVEAARAGEQGRGFVAVVAGEVRNLASRSAGAAKEIKALIEDSVSRVDGSSVLVEASAGETMTDIVNAVTRVTDIMGEIASASDEQSRGIDQVALAVSEMD | 479 |                                                                |
| TCP  | AAVEAARAGEQGRGFVAVVAGEVRTLASRSAGAAKEIKVLIENSVSRIIDTGSTQVREAGETMKEIVNAVTRVTDIMGEIASASDEQSKGIEQVAQVSEMD  | 480 |                                                                |
|      |                                                                                                        |     |                                                                |
| MCPB | SVTQQNAALVEQVSAAAAALERTQEDLQRSVQQFRLSASEPQQRVT---AKAAPGVQRMASAPAQSTDEWVSF                              | 547 | Transmembrane Domains                                          |
| MCPB | AATQQNSCLVEESVAAAAASLNEQALHLKELVNVFRVREEDTQPA-----                                                     |     | Ligand Binding Sites                                           |
| TRG  | RVTQQNASLVEEASAAARSLEEQAARLTQAVDAFRLHDTGATMRSSF-----                                                   |     | HAMP Domain                                                    |
| TSR  | RVTQQNASLVEEASAAAAALEEQASRLTQAVAVFRIHQQRAREVAAVKTPAAVS--SPKAAVADGSDNWETF                               | 553 |                                                                |
| TAR  | RVTQQNASLVQESAAAAALEEQASRLTQAVSAFRLASRPLAVNKPEMRLSVNAQSGNTPQSLAARDANWETF                               | 553 | Methyl-Accepting Chemotaxis Sensory Signal Transduction Domain |
| TCP  | SVTQQNASLVEEASAAAAALEEQANELRQAVAAAFRIKQPRREASP-----TTLKGLTPQPAEQ--ANWESF                               | 547 | Tsr/Tar Methylation Sites                                      |

Fig. S2

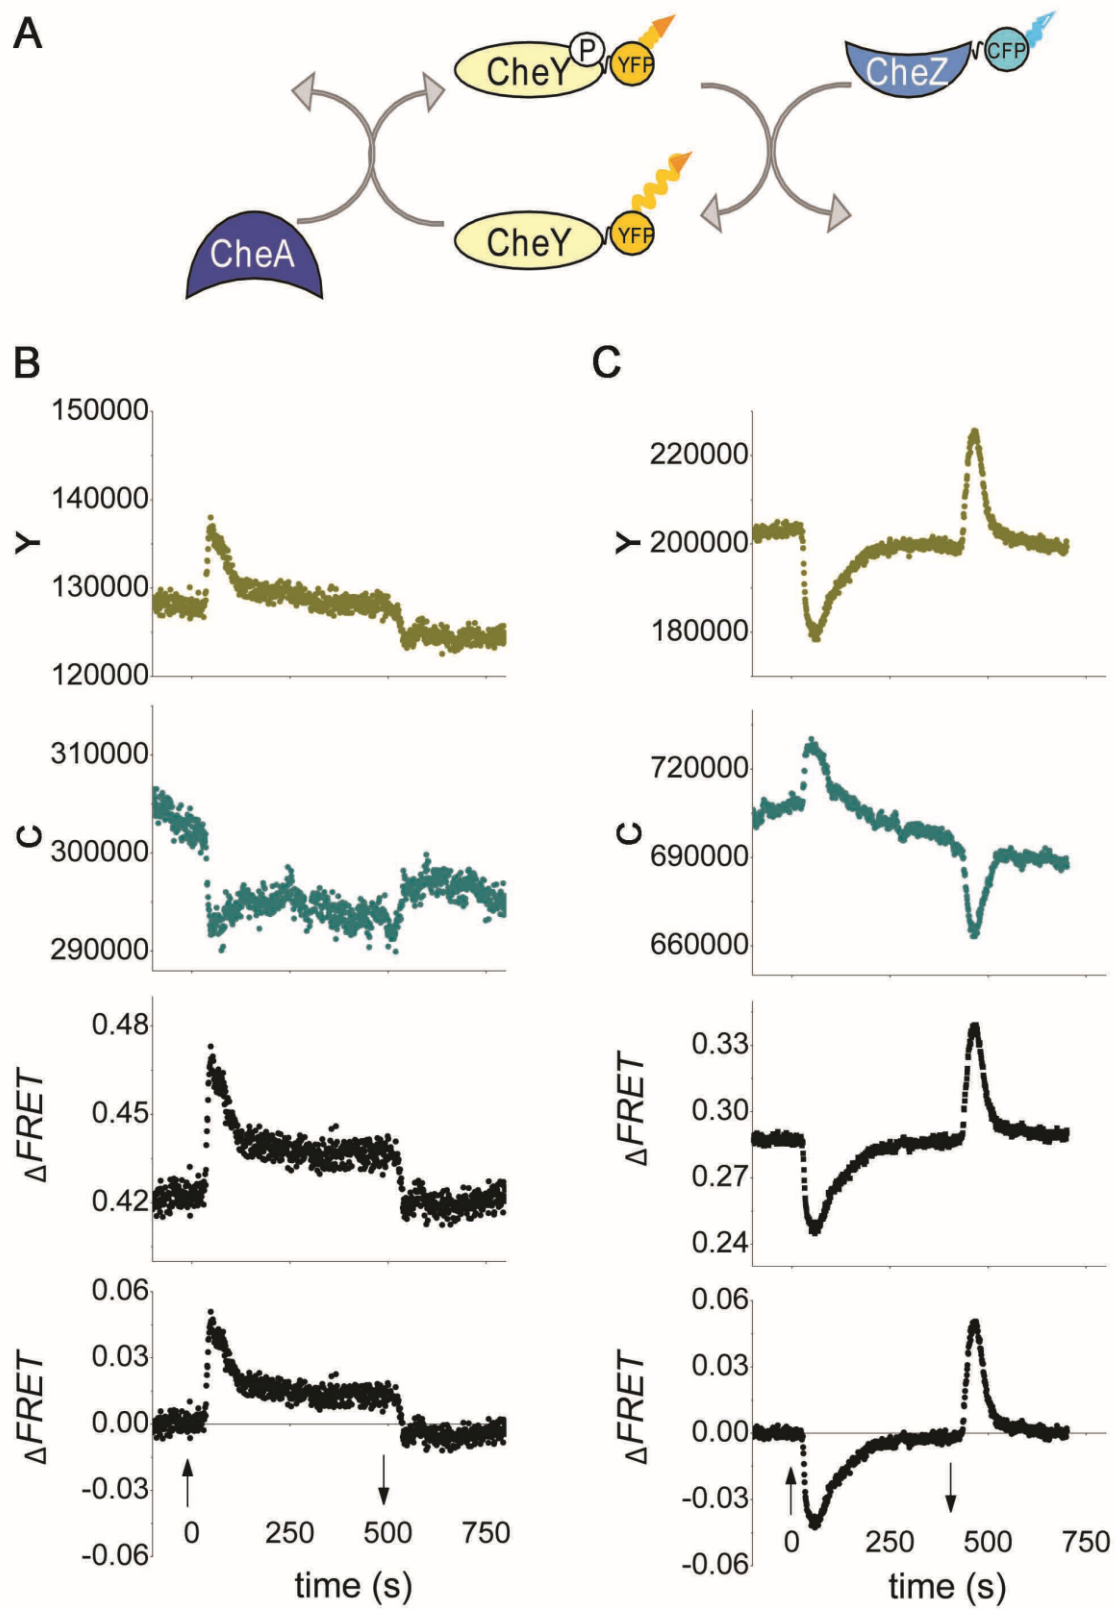

Fig. S3

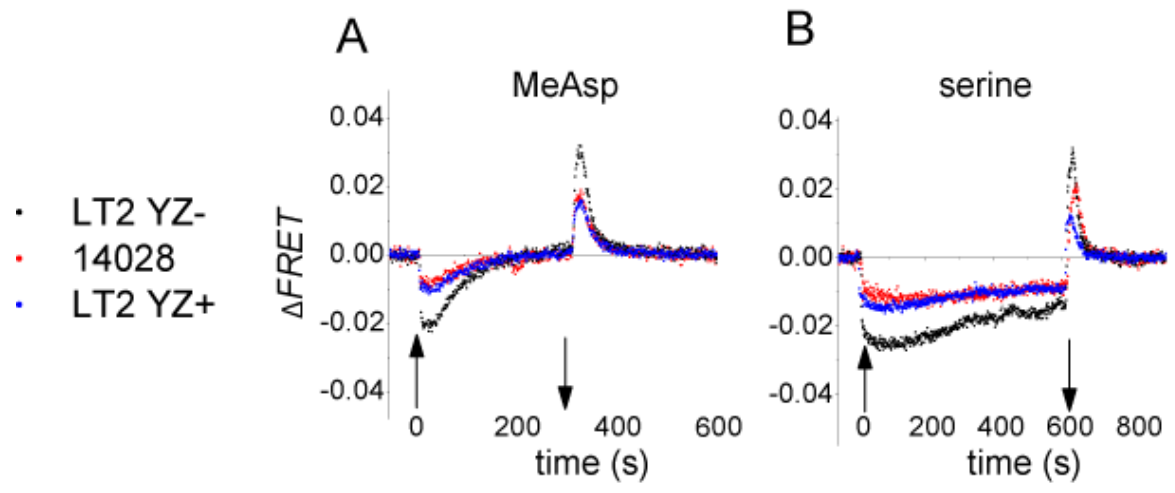

Fig. S4

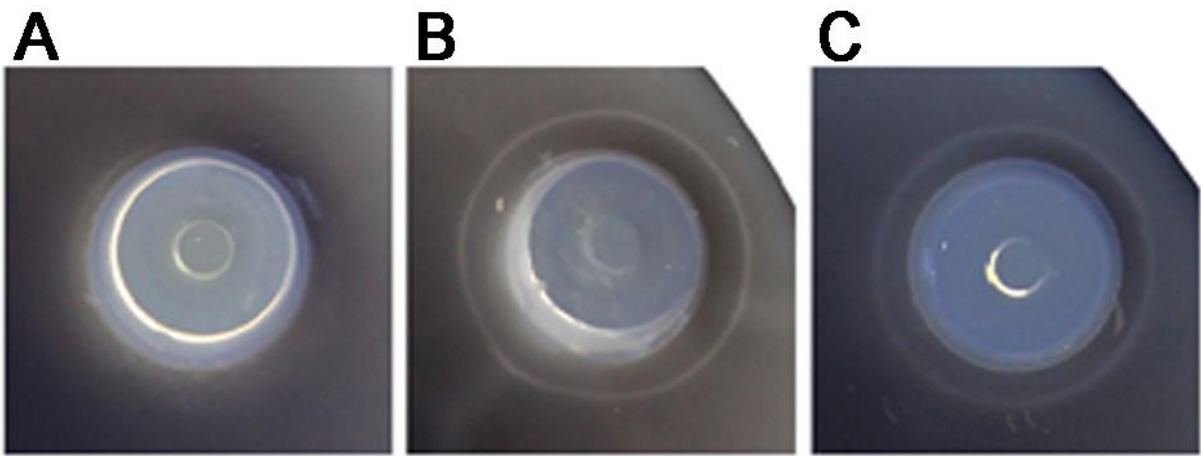

Fig. S5

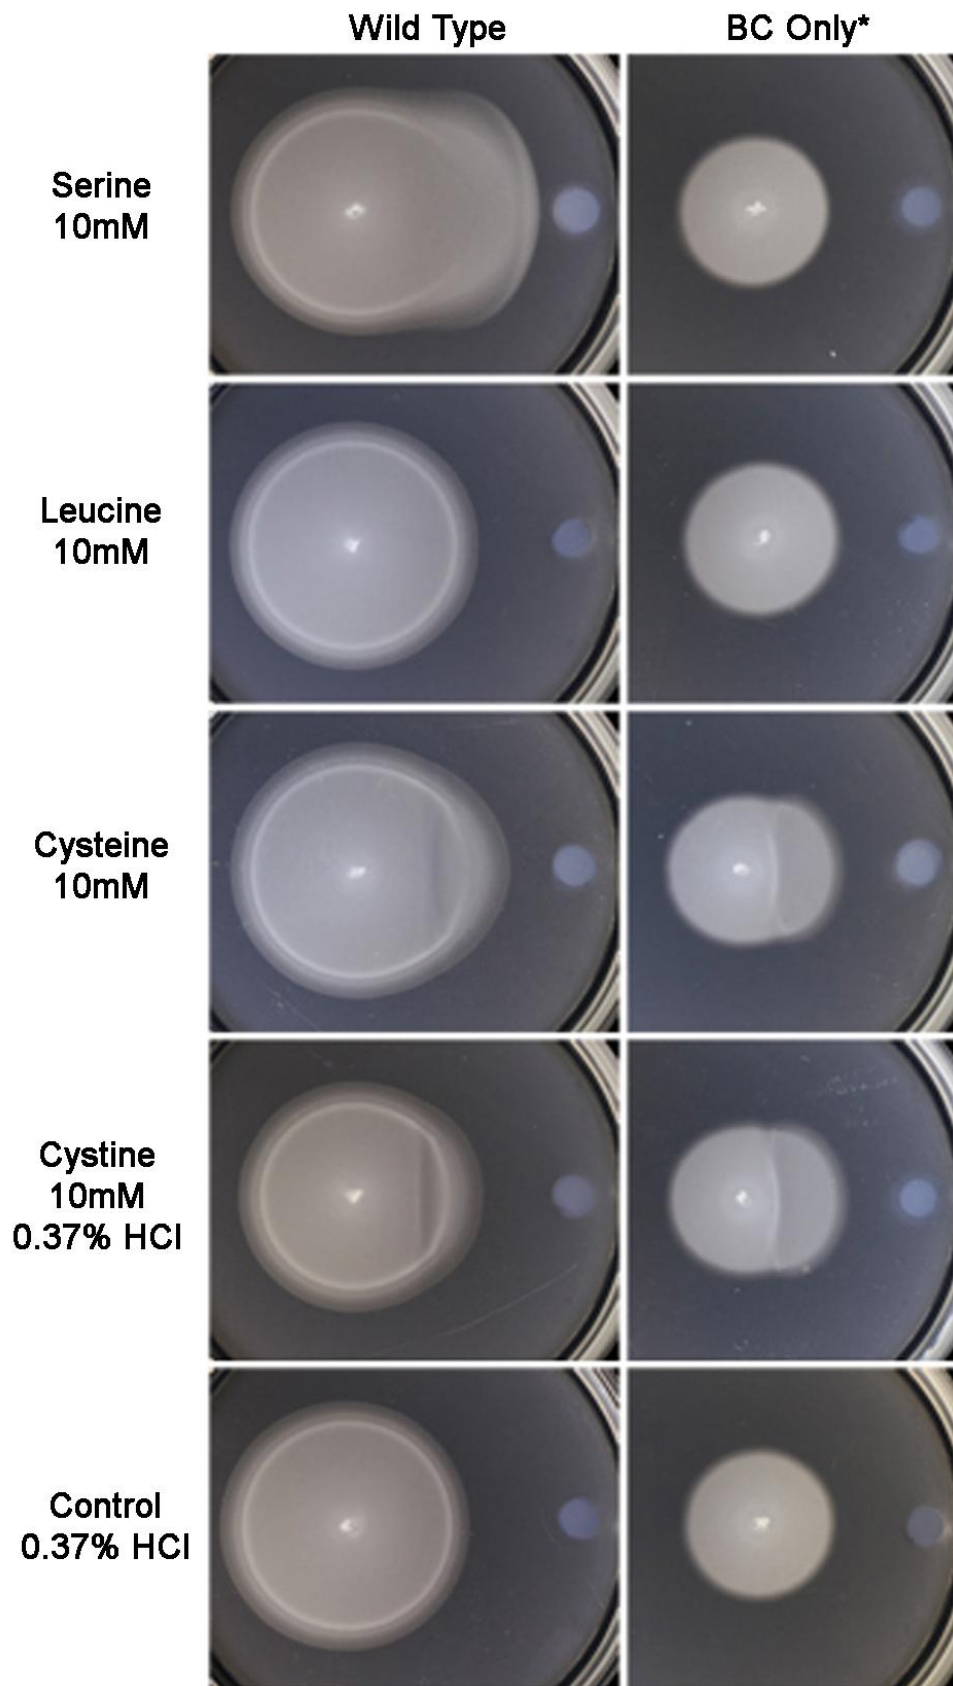

Supplement: NIHMS367916-supplement-Supp_Fig_S1-S5.pdf [file NIHMS367916-supplement-Supp_Fig_S1-S5.pdf]
